important, and with ORG NC45, both of these properties exist. From the results of this initial clinical study, we believe more intense clinical trials are indicated.

### References

1. Durant NN, Marshall IG, Savage DS, et al: The neuromuscular and autonomic blocking activities of pancuronium, ORG NC45 and other pancuronium analogues in the cat. *J Pharm Pharmacol* 31:832-836, 1979
2. Booij LHDJ, Edwards RP, Sohn YJ, et al: Cardiovascular and neuromuscular effects of ORG NC45, pancuronium, metocurine and *d*-tubocurarine in dogs. *Anesth Analg (Cleve)* 59:26-30, 1980
3. Krieg N, Crul JF, Booij LHDJ: Relative potency of ORG NC45, pancuronium, alcuronium and tubocurarine in anaesthetized man. *Br J Anaesth* 52:783-788, 1980
4. Donlon JV, Ali HH, Savarese JJ: A new approach to the study of four nondepolarizing relaxants in man. *Anesth Analg (Cleve)* 53:934-939, 1974
5. Zar JH: *Biostatistical Analysis*. Englewood Cliffs, Prentice-Hall, 1974, pp 109-114, 133-139, 230-232
6. Miller RD, Larson CP, Way WL: Comparative antagonism of *d*-tubocurarine-, gallamine-, and pancuronium-induced neuromuscular blockades by neostigmine. *ANESTHESIOLOGY* 37: 503-509, 1972
7. Booij LHDJ, van der Pol F, Crul JF, et al: Antagonism of ORG NC45 neuromuscular blockade by neostigmine, pyridostigmine and 4-aminopyridine. *Anesth Analg (Cleve)* 59:31-34, 1980
8. Savarese JJ, Kitz RJ: The quest for a short-acting nondepolarizing neuromuscular blocking agent. *Acta Anaesth Scand (Suppl)* 53:43-58, 1973

### Errata

The article, "The Dynamic Responses of Liquid-filled Catheter Systems for Direct Measurements of Blood Pressure" (*ANESTHESIOLOGY* 53:498-504, 1980), contained several errors. Trantec® is spelled incorrectly (Tranek®) on pages 499 and 501. In the footnotes on page 499, Jelco is spelled Telco, and Tygon® is a product of Norton Health Care Products, Akron, Ohio 44309, not North American Instrument Company.
